# Supplementary material for: Selenium-doped mixed metal oxide nanoparticles decorated on g-C3N4 and MXene sheets as promising bifunctional oxygen electrocatalysts for rechargeable Zn–air batteries
Source: Royal Society of Chemistry journal article supplement (doi:10.1039/d3se01419c), 2024-01-01
Supplement: d3se01419c1.pdf [file d3se01419c1.pdf]

## Supporting Information

### **Selenium doped Co-Fe mixed metal oxide decorated on g-C<sub>3</sub>N<sub>4</sub> and MXenes as bifunctional Oxygen electrocatalyst for rechargeable Zn-Air battery**

Mohadese Rastgoo-Deylami<sup>1</sup>, Ali Esfandiar<sup>1\*</sup>, Valeri P. Tolstoy<sup>2</sup>

<sup>1</sup> *Department of Physics, Sharif University of Technology, Tehran 11155-9161, Iran.*

<sup>2</sup> *Institute of Chemistry Saint Petersburg State University, Saint Petersburg, 198504, Russia*

\* [esfandiar@sharif.ir](mailto:esfandiar@sharif.ir)

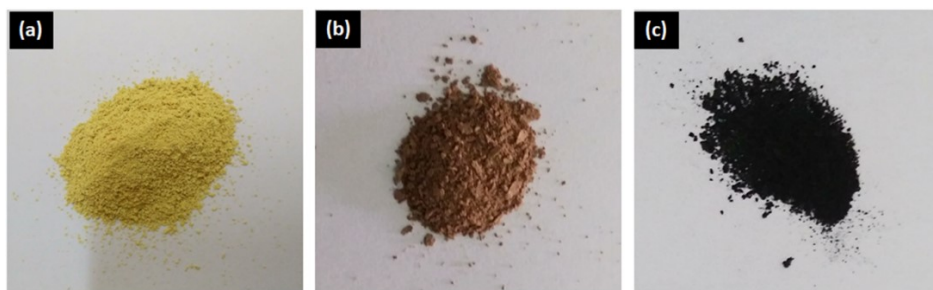

**Figure S1.** Photographic images of (a) SgCN, (b) CF/SgCN and (c) SeCF-MMO/ SgCN:MX powder.

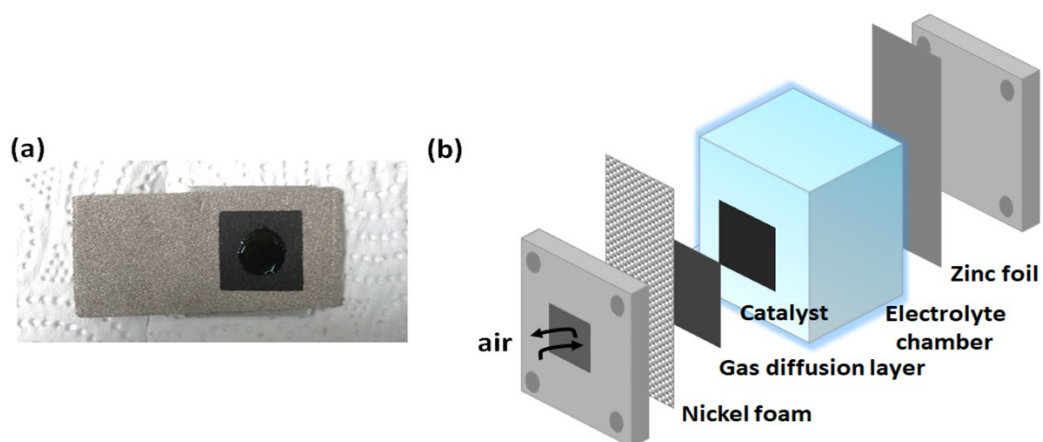

**Figure S2.** (a) Photographic image of electrocatalyst electrode and (b) schematic diagram of home-made zinc/air cell.

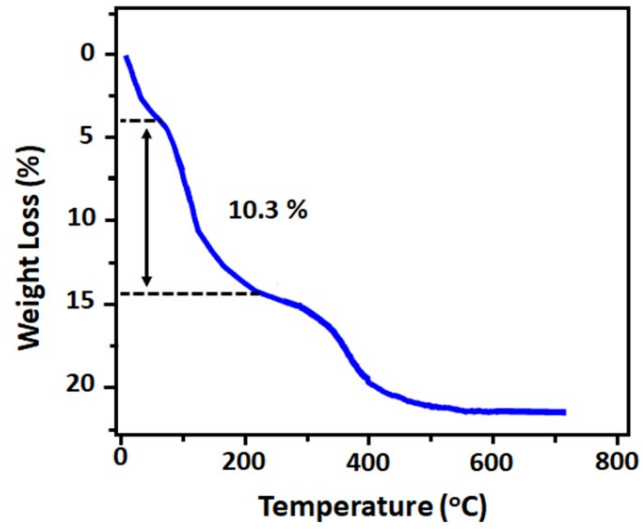

**Figure S3.** Thermogravimetric analysis for CoFe-LDH compound (CF sample).

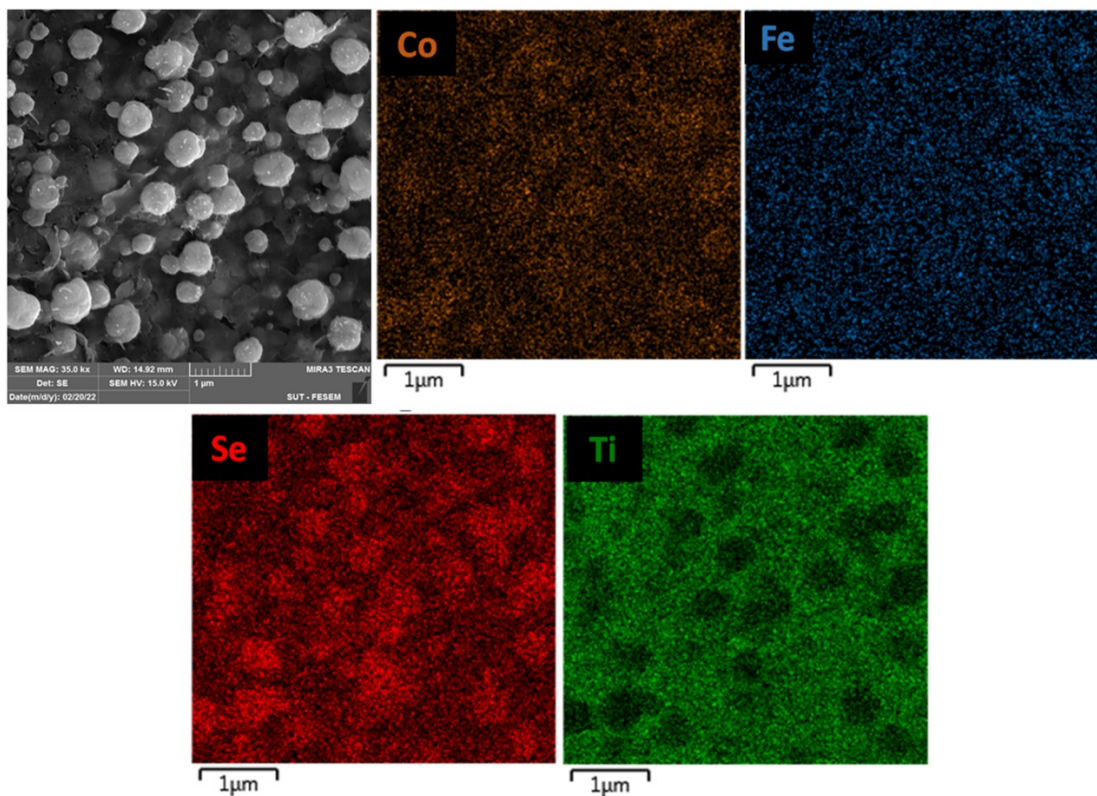

**Figure S4.** The Energy Dispersive Spectroscopy (EDS) mapping of Se-doped CoFe Mixed Metal Oxide/S-doped  $g\text{-C}_3\text{N}_4\text{:Ti}_3\text{C}_2\text{T}_x$  (SeCF-MMO/SgCN:MX) sample.

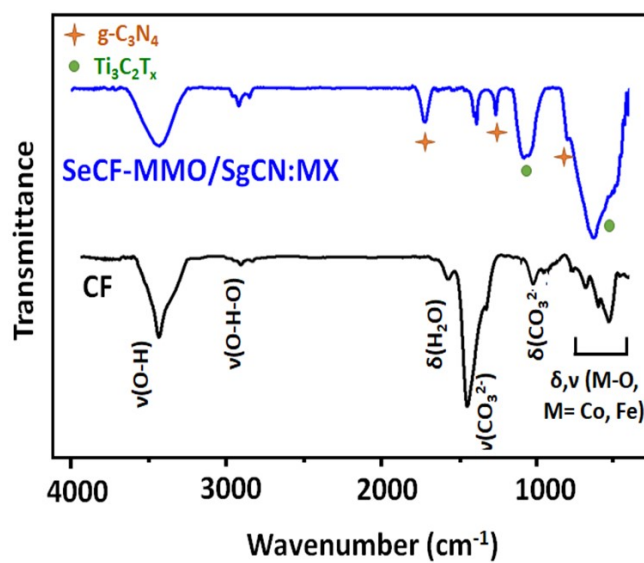

**Figure S5.** FT-IR spectra of CF and SeCF-MMO/SgCN:MX.

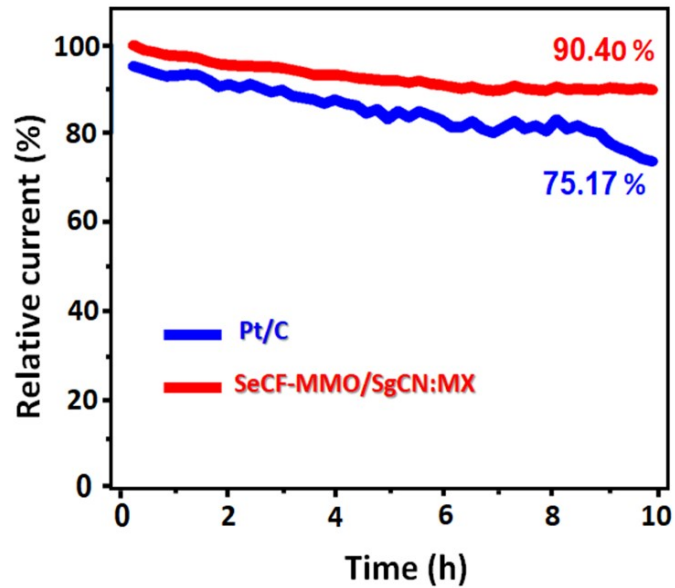

**Figure S6.** The ORR stability of Pt/C and SeCF-MMO/SgCN:MX samples.

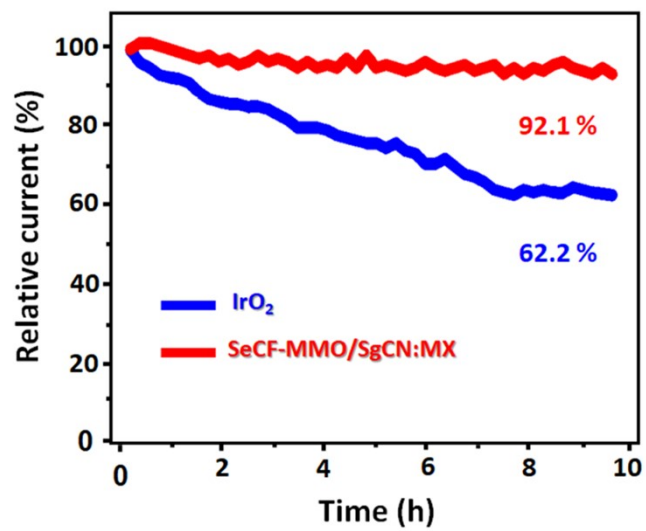

**Figure S7.** The OER stability of IrO<sub>2</sub> and SeCF-MMO/SgCN:MX samples.

**Table S1.** Elemental ratios calculated by ICP (Inductively Coupled Plasma) analysis for CoFe-LDH compound.

| Sample                                                                                                                            | Mass ratio % |       | Relative atomic ratio |      |
|-----------------------------------------------------------------------------------------------------------------------------------|--------------|-------|-----------------------|------|
|                                                                                                                                   | Co           | Fe    | Co                    | Fe   |
| [Co <sub>0.75</sub> Fe <sub>0.25</sub> (OH) <sub>2</sub> ](CO <sub>3</sub> <sup>2-</sup> ) <sub>0.125</sub> ·0.64H <sub>2</sub> O | 76.01        | 24.02 | 0.75                  | 0.25 |

**Table S2.** Comparison electrocatalysts behavior of previously electrocatalyst reported and this work.

| Catalyst                                                                | Onset potential (V vs RHE) | Half potential (V vs RHE) | Limiting current density (mA cm <sup>-2</sup> ) | Ref  |
|-------------------------------------------------------------------------|----------------------------|---------------------------|-------------------------------------------------|------|
| AC-HC                                                                   | 0.92                       | 0.77                      | Large                                           | [1]  |
| CNT/Ag1/CNF                                                             | 0.874                      | 0.724                     | -5.1                                            | [2]  |
| Fe-N-C/HPCS@CNT                                                         |                            | 0.873                     | 6.01                                            | [3]  |
| Pt <sub>1.1</sub> Fe <sub>8.8</sub> NiPF                                | 1.0                        | 0.87                      |                                                 | [4]  |
| Co@IC/MoC@PC                                                            | 1.034                      | 0.875                     | 5.89                                            | [5]  |
| Ag/Ag <sub>2</sub> O @MCOF(Co)                                          | 0.87                       | 0.76                      | -4.8                                            | [6]  |
| FeCo SAs@Co/N-GC                                                        |                            | 0.88                      | 6.70                                            | [7]  |
|                                                                         |                            | Pt/C (0.84)               |                                                 |      |
| Co <sub>0.25</sub> Ni <sub>0.75</sub> @NCNT30                           | 0.94                       | 0.84                      |                                                 | [8]  |
| FeCo/N-CNTs@CC                                                          | 0.87                       | 0.78                      | 5.63                                            | [9]  |
| MnCoNi-C-D                                                              | 0.91                       | 0.82                      |                                                 | [10] |
| V-Co <sub>3</sub> O <sub>4</sub>                                        |                            | 0.821                     |                                                 | [11] |
| CoWO <sub>4</sub> /WS <sub>2</sub> @C-N                                 | 1.15                       | 0.87                      |                                                 | [12] |
| NiCo <sub>2</sub> O <sub>4</sub> /N-G                                   | 0.90                       | 0.72                      | 5.27                                            | [13] |
| FeCO@NS-CA                                                              | 0.97                       | 0.87                      | 5.81                                            | [14] |
| Co <sub>3</sub> O <sub>4</sub> /NEGF                                    | 0.94                       | 0.80                      |                                                 | [15] |
| ZnCoFe-NC                                                               | 0.95                       | 0.878                     |                                                 | [16] |
| MnCoNi-C-D                                                              | 0.91                       | 0.82                      |                                                 | [10] |
| FeCo/Co <sub>2</sub> P@NPCF                                             | 0.85                       | 0.79                      |                                                 | [17] |
| Co/N@CNTs@CNMF800                                                       | 0.99                       | 0.86                      |                                                 | [18] |
| BFC-FC-0.2                                                              | 1.03                       | 0.9                       |                                                 | [19] |
|                                                                         | Pt/C (1.02)                | Pt/C (0.89)               |                                                 |      |
| Co@NCNTA-700                                                            | 0.973                      | 0.861                     |                                                 | [20] |
| (Cu, Co) <sub>3</sub> O <sub>3</sub> @CNT-C <sub>3</sub> N <sub>4</sub> | 0.8                        |                           |                                                 | [21] |
| NiO/ NiCo <sub>2</sub> O <sub>4</sub>                                   | 0.89                       | 0.73                      | 4.77                                            | [22] |
| N-C/Co-1                                                                | 0.94                       | 0.86                      |                                                 |      |

|                                                                         |             |           |                                        |              |
|-------------------------------------------------------------------------|-------------|-----------|----------------------------------------|--------------|
| NiCo <sub>2</sub> S <sub>4</sub> /RGO0.02                               |             | 0.78      |                                        | [23]         |
| Fe <sub>20</sub> @N/HCSs                                                |             | 0.85      | 5.75                                   | [24]         |
| Co <sub>3</sub> HITP2                                                   | 0.91        | 0.8       | 5.52                                   | [25]         |
| NF@Co <sub>3-x</sub> Ni <sub>x</sub> O <sub>4</sub>                     | 0.91        | 0.8       | 1.4                                    | [26]         |
| ONPC                                                                    | 0.95        | 0.79      | 5.8                                    | [27]         |
| IOSHs-NSC-Co <sub>9</sub> S <sub>8</sub>                                |             | 0.82      | 5.35                                   | [28]         |
| PtFe-DCNT                                                               | 0.95        | 0.84      | 5.3                                    | [29]         |
| MNG-CoFe                                                                | 0.98        | -         | -                                      | [30]         |
| Mn <sub>3</sub> O <sub>4</sub> /O-CNTs                                  | 0.92        | 0.85      |                                        | [31]         |
| NiFe <sub>2</sub> O <sub>4</sub> /FeNi <sub>2</sub> S <sub>4</sub> HNSs | 0.715       |           |                                        | [32]         |
| FeN <sub>x</sub> -embedded PNC                                          | 0.997       | 0.86      |                                        | [33]         |
| CoO-NSC-800                                                             |             | 0.74      | 5.5                                    | [34]         |
| Co-N, B-CSs                                                             |             | 0.83      | 5.66                                   | [35]         |
| Co <sub>2</sub> P@CNF                                                   | 0.915       | 0.803     | 5.27                                   | [36]         |
| CuCoO <sub>x</sub> /FeOOH                                               | 0.89        | 0.78      | 5.3                                    | [37]         |
| Co <sub>9</sub> S <sub>8</sub> /CD@NSC                                  |             | 0.84      |                                        | [38]         |
| Mn/Co-N-C0.02-800                                                       | 0.90        | 0.80      | 5.3                                    | [39]         |
| 3D Co-N-C NN                                                            | 1.05        |           | 6.3                                    | [40]         |
|                                                                         | Pt/C (1.04) |           | Pt/C (5.6) pt loading of<br>28.2 wt.%) |              |
| NiO/CoN PINWs                                                           | 0.89        | 0.68      |                                        | [41]         |
|                                                                         | Pt (0.95)   | Pt (0.78) |                                        |              |
| SeCF-MMO/SgCN:MX                                                        | 1.04        | 0.8       | 6.01                                   | This<br>work |

## References

- [1] J. Feng, R. Tang, X. Wang, and T. Meng, "Biomass-Derived Activated Carbon Sheets with Tunable Oxygen Functional Groups and Pore Volume for High-Performance Oxygen Reduction and Zn–Air Batteries," *ACS Applied Energy Materials*, vol. 4, no. 5, pp. 5230-5236, 2021.
- [2] S. Li *et al.*, "A Tough Flexible Cellulose Nanofiber Air Cathode for Oxygen Reduction Reaction with Silver Nanoparticles and Carbon Nanotubes in Rechargeable Zinc-Air Batteries," *Energy & Fuels*, vol. 35, no. 10, pp. 9017-9028, 2021.
- [3] F. Fan *et al.*, "Anchoring Fe–N–C Sites on Hierarchically Porous Carbon Sphere and CNT Interpenetrated Nanostructures as Efficient Cathodes for Zinc–Air Batteries," *ACS Applied Materials & Interfaces*, vol. 13, no. 35, pp. 41609-41618, 2021.
- [4] G. Wang, J. Chang, S. Koul, A. Kushima, and Y. Yang, "CO<sub>2</sub> Bubble-Assisted Pt Exposure in PtFeNi Porous Film for High-Performance Zinc-Air Battery," *Journal of the American Chemical Society*, vol. 143, no. 30, pp. 11595-11601, 2021.
- [5] L. Zhang *et al.*, "Co/MoC Nanoparticles Embedded in Carbon Nanoboxes as Robust Trifunctional Electrocatalysts for a Zn–Air Battery and Water Electrocatalysis," *ACS nano*, vol. 15, no. 8, pp. 13399-13414, 2021.
- [6] M. Wang *et al.*, "Efficient Ag/Ag<sub>2</sub>O-Doped Cobalt Metallo-Covalent Organic Framework Electrocatalysts for Rechargeable Zinc-Air Battery," *ACS Sustainable Chemistry & Engineering*, vol. 9, no. 17, pp. 5872-5883, 2021.
- [7] N. K. Wagh, D.-H. Kim, S.-H. Kim, S. S. Shinde, and J.-H. Lee, "Heuristic Iron–Cobalt-Mediated Robust pH-Universal Oxygen Bifunctional Lusters for Reversible Aqueous and Flexible Solid-State Zn–Air Cells," *ACS nano*, vol. 15, no. 9, pp. 14683-14696, 2021.

- [8] A. Kundu, A. Samanta, and C. R. Raj, "Hierarchical Hollow MOF-Derived Bamboo-like N-doped Carbon Nanotube-Encapsulated  $\text{Co}_{0.25}\text{Ni}_{0.75}$  Alloy: An Efficient Bifunctional Oxygen Electrocatalyst for Zinc–Air Battery," *ACS Applied Materials & Interfaces*, 2021.
- [9] Z. Li *et al.*, "Highly Nitrogen-Doped Carbon Nanotube Nanoarrays as Self-supported Bifunctional Electrocatalysts for Rechargeable and Flexible Zinc-Air Batteries," *ACS Sustainable Chemistry & Engineering*, vol. 9, no. 12, pp. 4498-4508, 2021.
- [10] X. Wang, J. Zhang, D. Ma, X. Feng, L. Wang, and B. Wang, "Metal–Organic Framework-Derived Trimetallic Nanocomposites as Efficient Bifunctional Oxygen Catalysts for Zinc–Air Batteries," *ACS Applied Materials & Interfaces*, vol. 13, no. 28, pp. 33209-33217, 2021.
- [11] Y. Rao, S. Chen, Q. Yue, and Y. Kang, "Optimizing the Spin States of Mesoporous  $\text{Co}_3\text{O}_4$  Nanorods through Vanadium Doping for Long-Lasting and Flexible Rechargeable Zn–Air Batteries," *ACS Catalysis*, vol. 11, pp. 8097-8103, 2021.
- [12] D. Yin *et al.*, "Polyoxometalate@ ZIF Induced  $\text{CoWO}_4/\text{WS}_2$ @CN Nanoflower as a Highly Efficient Catalyst for Zn–Air Batteries," *ACS Applied Energy Materials*, vol. 4, no. 7, pp. 6892-6902, 2021.
- [13] Y. Ma *et al.*, "Synthesis of Ultrasmall  $\text{NiCo}_2\text{O}_4$  Nanoparticle-Decorated N-Doped Graphene Nanosheets as an Effective Catalyst for Zn–Air Batteries," *Energy & Fuels*, vol. 35, no. 17, pp. 14188-14196, 2021.
- [14] H. Pang *et al.*, "Wood-Derived Bimetallic and Heteroatomic Hierarchically Porous Carbon Aerogel for Rechargeable Flow Zn–Air Batteries," *ACS Applied Materials & Interfaces*, vol. 13, no. 33, pp. 39458-39469, 2021.
- [15] N. Manna, S. K. Singh, G. P. Kharabe, A. Torris, and S. Kurungot, "Zinc–Air Batteries Catalyzed Using  $\text{Co}_3\text{O}_4$  Nanorod-Supported N-Doped Entangled Graphene for Oxygen Reduction Reaction," *ACS Applied Energy Materials*, vol. 4, no. 5, pp. 4570-4580, 2021.
- [16] G. Li *et al.*, "Zn, Co, and Fe Tridoped N–C Core–Shell Nanocages as the High-Efficiency Oxygen Reduction Reaction Electrocatalyst in Zinc–Air Batteries," *ACS Applied Materials & Interfaces*, 2021.
- [17] Q. Shi *et al.*, "High-Performance Trifunctional Electrocatalysts Based on  $\text{FeCo}/\text{Co}_2\text{P}$  Hybrid Nanoparticles for Zinc–Air Battery and Self-Powered Overall Water Splitting," *Advanced Energy Materials*, vol. 10, no. 10, p. 1903854, 2020.
- [18] T. Liu, J. Mou, Z. Wu, C. Lv, J. Huang, and M. Liu, "A facile and scalable strategy for fabrication of superior bifunctional freestanding air electrodes for flexible zinc–air batteries," *Advanced Functional Materials*, vol. 30, no. 36, p. 2003407, 2020.
- [19] Z. Pei *et al.*, "A Flexible Rechargeable Zinc–Air Battery with Excellent Low-Temperature Adaptability," *Angewandte Chemie*, vol. 132, no. 12, pp. 4823-4829, 2020.
- [20] L. Liu *et al.*, "Cobalt-encapsulated nitrogen-doped carbon nanotube arrays for flexible zinc–air batteries," *Small Methods*, vol. 4, no. 1, p. 1900571, 2020.
- [21] X. Wang *et al.*, "Cu/S-Occupation Bifunctional Oxygen Catalysts for Advanced Rechargeable Zinc–Air Batteries," *ACS Applied Materials & Interfaces*, vol. 12, no. 47, pp. 52836-52844, 2020.
- [22] Y. Li *et al.*, "Dual interface engineering of  $\text{NiO}/\text{NiCo}_2\text{O}_4/\text{CoO}$  heterojunction within graphene networks for high-performance lithium storage," *Electrochimica Acta*, p. 138536, 2021.
- [23] Y. Liang, Q. Gong, X. Sun, N. Xu, P. Gong, and J. Qiao, "Rational fabrication of thin-layered  $\text{NiCo}_2\text{S}_4$  loaded graphene as bifunctional non-oxide catalyst for rechargeable zinc-air batteries," *Electrochimica Acta*, vol. 342, p. 136108, 2020.
- [24] B. Wang *et al.*, "Space-Confined Yolk-Shell Construction of  $\text{Fe}_3\text{O}_4$  Nanoparticles Inside N-Doped Hollow Mesoporous Carbon Spheres as Bifunctional Electrocatalysts for Long-Term Rechargeable Zinc–Air Batteries," *Advanced Functional Materials*, vol. 30, no. 51, p. 2005834, 2020.



- [25] Y. Lian *et al.*, "Unpaired 3d electrons on atomically dispersed cobalt centres in coordination polymers regulate both oxygen reduction reaction (ORR) activity and selectivity for use in zinc–air batteries," *Angewandte Chemie International Edition*, vol. 59, no. 1, pp. 286-294, 2020.
- [26] M. Wu, G. Zhang, N. Chen, W. Chen, J. Qiao, and S. Sun, "A self-supported electrode as a high-performance binder-and carbon-free cathode for rechargeable hybrid zinc batteries," *Energy Storage Materials*, vol. 24, pp. 272-280, 2020.
- [27] Y. Wang *et al.*, "Direct Conversion of Biomass into Compact Air Electrode with Atomically Dispersed Oxygen and Nitrogen Coordinated Copper Species for Flexible Zinc–Air Batteries," *ACS Applied Energy Materials*, vol. 2, no. 12, pp. 8659-8666, 2019.
- [28] K. Tang, C. Yuan, Y. Xiong, H. Hu, and M. Wu, "Inverse-opal-structured hybrids of N, S-codoped-carbon-confined Co<sub>9</sub>S<sub>8</sub> nanoparticles as bifunctional oxygen electrocatalyst for on-chip all-solid-state rechargeable Zn-air batteries," *Applied Catalysis B: Environmental*, vol. 260, p. 118209, 2020.
- [29] S. Zeng *et al.*, "PtFe alloy nanoparticles confined on carbon nanotube networks as air cathodes for flexible and wearable energy devices," *ACS Applied Nano Materials*, vol. 2, no. 12, pp. 7870-7879, 2019.
- [30] W. Niu and Y. Yang, "Amorphous MOF introduced N-doped graphene: An efficient and versatile electrocatalyst for Zinc–air battery and water splitting," *ACS Applied Energy Materials*, vol. 1, no. 6, pp. 2440-2445, 2018.
- [31] L. Li *et al.*, "Anchoring Mn<sub>3</sub>O<sub>4</sub> nanoparticles on oxygen functionalized carbon nanotubes as bifunctional catalyst for rechargeable zinc-air battery," *ACS Applied Energy Materials*, vol. 1, no. 3, pp. 963-969, 2018.
- [32] L. An *et al.*, "Heterostructure-promoted oxygen electrocatalysis enables rechargeable zinc–air battery with neutral aqueous electrolyte," *Journal of the American Chemical Society*, vol. 140, no. 50, pp. 17624-17631, 2018.
- [33] L. Ma *et al.*, "Single-site active iron-based bifunctional oxygen catalyst for a compressible and rechargeable zinc–air battery," *ACS nano*, vol. 12, no. 2, pp. 1949-1958, 2018.
- [34] S. Chen, S. Chen, B. Zhang, and J. Zhang, "Bifunctional Oxygen Electrocatalysis of N, S-Codoped Porous Carbon with Interspersed Hollow CoO Nanoparticles for Rechargeable Zn–Air Batteries," *ACS applied materials & interfaces*, vol. 11, no. 18, pp. 16720-16728, 2019.
- [35] Y. Guo *et al.*, "Carbon nanosheets containing discrete Co-N<sub>x</sub>-B<sub>y</sub>-C active sites for efficient oxygen electrocatalysis and rechargeable Zn–Air Batteries," *ACS nano*, vol. 12, no. 2, pp. 1894-1901, 2018.
- [36] J. Gao *et al.*, "Co<sub>2</sub>P@N,P-codoped carbon nanofiber as a free-standing air electrode for Zn–Air batteries: synergy effects of CoN<sub>x</sub> satellite shells," *ACS applied materials & interfaces*, vol. 11, no. 10, pp. 10364-10372, 2019.
- [37] M. Kuang *et al.*, "CuCoO<sub>x</sub>/FeOOH Core–shell nanowires as an efficient bifunctional oxygen evolution and reduction catalyst," *ACS Energy Letters*, vol. 2, no. 10, pp. 2498-2505, 2017.
- [38] P. Zhang *et al.*, "Efficient oxygen electrocatalyst for Zn–air batteries: carbon dots and Co<sub>9</sub>S<sub>8</sub> nanoparticles in a N, S-codoped carbon matrix," *ACS applied materials & interfaces*, vol. 11, no. 15, pp. 14085-14094, 2019.
- [39] L. Wei, L. Qiu, Y. Liu, J. Zhang, D. Yuan, and L. Wang, "Mn-doped Co–N–C dodecahedron as a bifunctional electrocatalyst for highly efficient Zn–air batteries," *ACS Sustainable Chemistry & Engineering*, vol. 7, no. 16, pp. 14180-14188, 2019.
- [40] R. Wang *et al.*, "MOF@ Cellulose Derived Co–N–C Nanowire Network as an Advanced Reversible Oxygen Electrocatalyst for Rechargeable Zinc–Air Batteries," *ACS Applied Energy Materials*, vol. 1, no. 3, pp. 1060-1068, 2018.
- [41] J. Yin *et al.*, "NiO/CoN porous nanowires as efficient bifunctional catalysts for Zn–air batteries," *ACS nano*, vol. 11, no. 2, pp. 2275-2283, 2017.
